# Supplementary material
Source: MDPI journal article supplement (https://www.mdpi.com/2313-0105/10/4/118)
Supplement: s1 [file s1]

# Assessment of run-off waters resulting from lithium-ion battery fire-fighting operations

*Arnaud Bordes<sup>1</sup>, Arnaud Papin<sup>1</sup>, Guy Marlair<sup>1\*</sup>, Théo Claude<sup>1</sup>, Ahmad El-Masri<sup>1</sup>, Thierry Durussel<sup>1</sup>, Jean-Pierre Bertrand<sup>1</sup>, Benjamin Truchot<sup>1</sup> and Amandine Lecocq<sup>1</sup>*

<sup>1</sup> Institut National de l'Environnement Industriel et des Risques (Ineris), Parc Technologique Alata, BP2, 60550 Verneuil-en-Halatte, France

\* Correspondence: guy.marlair@ineris.fr; Tel.: +33 344556348

## Supporting information

### Calculation for the table 6 extrapolation

Hypothesis :

- In real scenario: 0,12 L/Wh used
- In test 1 : 0.014 L/Wh
- In test 2 : 0.024 L/Wh
- In test 3 : 0.01 L/Wh
- The normalized water flow rate (per watt-hour) does not significantly influence the mass transfer of pollutants in the run-off water.

To obtain table 6 values, concentration of selected species were taken from table 1 (for metals), table 2 (for naphthalene) and table 3 (for EC and EMC) and multiplied by

- 0.12 for test 1 (= 0.014/0,12)
- 0.20 for test 2 (= 0.024/0,12)
- 0.08 for test 3 (= 0.01/0,12)
